# Supplementary material for: Northern Hemisphere temperature patterns in the last 12 centuries
Source: Copernicus journal article supplement (doi:10.5194/cp-8-227-2012), 2012-02-03
Supplement: Supplementary file 2 [file cp-8-227-2012-supplement.zip]

Archive with 5 entries (5 files):
- RawGriddedSplineValues.m4v
- RawSplineValues.m4v
- Supplement_Ljungqvist.pdf
- GriddedProxyCenteredWeightedSplineValues.m4v
- ProxyCenteredWeightedSplineValues.m4v
